# Supplementary material for: Capturing Expert Knowledge for the Personalization of Cognitive Rehabilitation: Study Combining Computational Modeling and a Participatory Design Strategy
Source: PubMed Central journal article supplement (PMC6318149; doi:10.2196/10714), 2018-12-06
Supplement: rehab_v5i2e10714_app1.pdf [file rehab_v5i2e10714_app1.pdf]

---

| Tasks | Word search | Problem resolution | Numeric sequences | Action sequencing | Association | Cancellation | Categorization | Contexts | Image pairs | Mazes | Memory of stories |
|-------|-------------|--------------------|-------------------|-------------------|-------------|--------------|----------------|----------|-------------|-------|-------------------|
| Alpha | 0.981       | 0.987              | 0.997             | 0.973             | 0.975       | 0.990        | 0.953          | 0.945    | 0.963       | 0.975 | 0.918             |

---
