# Supplementary material for: Capturing Expert Knowledge for the Personalization of Cognitive Rehabilitation: Study Combining Computational Modeling and a Participatory Design Strategy
Source: PubMed Central journal article supplement (PMC6318149; doi:10.2196/10714), 2018-12-06
Supplement: rehab_v5i2e10714_app2.pdf [file rehab_v5i2e10714_app2.pdf]

| Word search task | Memory            |                |                | Attention         |                |                | Executive functions |                |                | Difficulty        |                |                |
|------------------|-------------------|----------------|----------------|-------------------|----------------|----------------|---------------------|----------------|----------------|-------------------|----------------|----------------|
|                  | Coefficient value | Standard error | <i>t</i> value | Coefficient value | Standard error | <i>t</i> value | Coefficient value   | Standard error | <i>t</i> value | Coefficient value | Standard error | <i>t</i> value |
| Intercept        | 4.000             | 0.752          | 5.320          | 6.150             | 0.617          | 9.968          | 5.138               | 0.715          | 7.187          | 5.466             | 0.688          | 7.947          |
| Clue words       | -1.000            | 0.346          | -2.893         | -.700             | 0.327          | -2.142         | -0.913              | 0.229          | -3.993         | -1.154            | 0.287          | -4.013         |
| Words number     | 0.269             | 0.071          | 3.809          | 0.144             | 0.067          | 2.155          | 0.171               | 0.054          | 3.169          | 0.176             | 0.069          | 2.561          |

| Model quality                  | Memory   | Attention | Executive functions | Difficulty |
|--------------------------------|----------|-----------|---------------------|------------|
| Akaike Information Criterion   | 403.9686 | 384.4461  | 345.6128            | 373.7182   |
| Bayesian Information Criterion | 416.8422 | 397.3196  | 363.6358            | 391.7411   |
| Order                          | No       | No        | Yes                 | Yes        |
| Autocorrelation                | No       | No        | No                  | No         |
