# Supplementary material for: Capturing Expert Knowledge for the Personalization of Cognitive Rehabilitation: Study Combining Computational Modeling and a Participatory Design Strategy
Source: PubMed Central journal article supplement (PMC6318149; doi:10.2196/10714), 2018-12-06
Supplement: rehab_v5i2e10714_app3.pdf [file rehab_v5i2e10714_app3.pdf]

| Numeric sequences task | Memory            |                |                | Attention         |                |                | Executive functions |                |                | Language          |                |                | Difficulty        |                |                |
|------------------------|-------------------|----------------|----------------|-------------------|----------------|----------------|---------------------|----------------|----------------|-------------------|----------------|----------------|-------------------|----------------|----------------|
|                        | Coefficient value | Standard error | <i>t</i> value | Coefficient value | Standard error | <i>t</i> value | Coefficient value   | Standard error | <i>t</i> value | Coefficient value | Standard error | <i>t</i> value | Coefficient value | Standard error | <i>t</i> value |
| Intercept              | 5.364             | 0.700          | 7.667          | 6.923             | 0.528          | 13.103         | 6.682               | 0.570          | 11.715         | 4.722             | 0.630          | 7.497          | 1.290             | 0.515          | 2.506          |
| Step Ascending         | —                 | —              | —              | —                 | —              | —              | —                   | —              | —              | —                 | —              | —              | 1.232             | 0.126          | 9.750          |
| Missing Position       | -0.027            | 0.009          | -3.142         | -0.020            | 0.006          | -3.342         | -0.014              | 0.005          | -2.818         | -0.020            | 0.007          | -3.100         | —                 | —              | —              |
|                        | -0.003            | 0.001          | -2.835         | -0.003            | 0.001          | -3.017         | -0.002              | 0.001          | -2.546         | -0.003            | 0.001          | -2.799         | —                 | —              | —              |

| Model quality                  | Memory   | Attention | Executive functions | Language  | Difficulty |
|--------------------------------|----------|-----------|---------------------|-----------|------------|
| Akaike Information Criterion   | 177.0194 | -97.91632 | -272.89619          | -34.42772 | 480.4425   |
| Bayesian Information Criterion | 208.8909 | -66.04483 | -241.02470          | -2.55623  | 504.8925   |
| Order                          | Yes      | Yes       | Yes                 | Yes       | Yes        |
| Autocorrelation                | Yes      | Yes       | Yes                 | Yes       | Yes        |
