# Supplementary material for: Capturing Expert Knowledge for the Personalization of Cognitive Rehabilitation: Study Combining Computational Modeling and a Participatory Design Strategy
Source: PubMed Central journal article supplement (PMC6318149; doi:10.2196/10714), 2018-12-06
Supplement: rehab_v5i2e10714_app4.pdf [file rehab_v5i2e10714_app4.pdf]

| Action          | Memory            |                |                | Attention         |                |                | Executive functions |                |                | Language          |                |                | Difficulty        |                |                |
|-----------------|-------------------|----------------|----------------|-------------------|----------------|----------------|---------------------|----------------|----------------|-------------------|----------------|----------------|-------------------|----------------|----------------|
| sequencing task | Coefficient value | Standard error | <i>t</i> value | Coefficient value | Standard error | <i>t</i> value | Coefficient value   | Standard error | <i>t</i> value | Coefficient value | Standard error | <i>t</i> value | Coefficient value | Standard error | <i>t</i> value |
| Intercept       | 1.507             | 0.669          | 2.254          | 2.90              | 0.691          | 4.197          | 2.838               | 0.911          | 3.113          | 3.325             | 0.812          | 4.096          | 1.950             | 0.664          | 2.937          |
| Actions number  | 0.635             | 0.153          | 4.159          | 0.75              | 0.125          | 5.988          | 0.487               | 0.202          | 2.409          | 0.525             | 0.146          | 3.601          | 0.862             | 0.124          | 6.966          |
| Task goal       | —                 | —              | —              | -1.10             | .251           | -4.391         | —                   | —              | —              | -1.200            | 0.292          | -4.115         | -1.325            | 0.248          | -5.351         |

| Model quality                  | Memory   | Attention | Executive functions | Language | Difficulty |
|--------------------------------|----------|-----------|---------------------|----------|------------|
| Akaike Information Criterion   | 334.9841 | 307.1238  | 358.3382            | 331.2999 | 302.795    |
| Bayesian Information Criterion | 349.1244 | 318.8428  | 367.7650            | 343.0189 | 314.5140   |
| Order                          | Yes      | No        | No                  | No       | No         |
| Autocorrelation                | No       | No        | No                  | No       | No         |
