# Supplementary material for: Capturing Expert Knowledge for the Personalization of Cognitive Rehabilitation: Study Combining Computational Modeling and a Participatory Design Strategy
Source: PubMed Central journal article supplement (PMC6318149; doi:10.2196/10714), 2018-12-06
Supplement: rehab_v5i2e10714_app5.pdf [file rehab_v5i2e10714_app5.pdf]

| Association<br>task | Memory               |                   |                   | Attention            |                   |                   | Executive functions  |                   |                   | Language             |                   |                   | Difficulty           |                   |                   |
|---------------------|----------------------|-------------------|-------------------|----------------------|-------------------|-------------------|----------------------|-------------------|-------------------|----------------------|-------------------|-------------------|----------------------|-------------------|-------------------|
|                     | Coefficient<br>value | Standard<br>error | <i>t</i><br>value | Coefficient<br>value | Standard<br>error | <i>t</i><br>value | Coefficient<br>value | Standard<br>error | <i>t</i><br>value | Coefficient<br>value | Standard<br>error | <i>t</i><br>value | Coefficient<br>value | Standard<br>error | <i>t</i><br>value |
| Intercept           | 1.367                | 0.782             | 1.747             | 1.513                | 0.721             | 2.099             | 2.729                | 0.721             | 3.788             | 2.221                | 0.403             | 5.511             | 1.533                | 0.701             | 2.186             |
| Pairs<br>number     | 0.400                | 0.117             | 3.426             | 0.487                | 0.100             | 4.892             | 0.237                | 0.088             | 2.701             | 0.106                | 0.038             | 2.816             | 0.450                | 0.104             | 4.323             |

| Model quality                  | Memory   | Attention | Executive functions | Language | Difficulty |
|--------------------------------|----------|-----------|---------------------|----------|------------|
| Akaike Information Criterion   | 265.1870 | 252.8099  | 225.6666            | 213.2304 | 252.3468   |
| Bayesian Information Criterion | 273.4288 | 261.0517  | 238.0292            | 225.5931 | 260.5886   |
| Order                          | No       | No        | Yes                 | Yes      | No         |
| Autocorrelation                | No       | No        | No                  | No       | No         |
