# Supplementary material for: Capturing Expert Knowledge for the Personalization of Cognitive Rehabilitation: Study Combining Computational Modeling and a Participatory Design Strategy
Source: PubMed Central journal article supplement (PMC6318149; doi:10.2196/10714), 2018-12-06
Supplement: rehab_v5i2e10714_app6.pdf [file rehab_v5i2e10714_app6.pdf]

| Cancellation task | Memory            |                |                | Attention         |                |                | Executive functions |                |                | Language          |                |                | Difficulty        |                |                |
|-------------------|-------------------|----------------|----------------|-------------------|----------------|----------------|---------------------|----------------|----------------|-------------------|----------------|----------------|-------------------|----------------|----------------|
|                   | Coefficient value | Standard error | <i>t</i> value | Coefficient value | Standard error | <i>t</i> value | Coefficient value   | Standard error | <i>t</i> value | Coefficient value | Standard error | <i>t</i> value | Coefficient value | Standard error | <i>t</i> value |
| Intercept         | 3.125             | 0.505          | 6.193          | 4.314             | 0.532          | 8.103          | 3.459               | 0.504          | 6.862          | 2.839             | 0.497          | 5.717          | 3.610             | 0.514          | 7.018          |
| Distractors       | 0.009             | 0.003          | 2.959          | 0.014             | 0.003          | 4.327          | 0.014               | 0.003          | 4.087          | 0.009             | 0.003          | 3.383          | 0.015             | 0.003          | 4.601          |
| Letters           | —                 | —              | —              | —                 | —              | —              | -0.814              | 0.211          | -3.853         | -0.480            | 0.178          | -2.701         | -0.494            | 0.210          | —              |
| Numbers           | -0.813            | 0.214          | 3.126          | -0.697            | 0.235          | -2.969         | -0.845              | 0.236          | -3.587         | -0.790            | 0.204          | -3.869         | -1.054            | 0.240          | -4.385         |
| Targets           | 0.017             | 0.005          | -3.802         | 0.021             | 0.006          | 3.526          | 0.012               | 0.005          | 2.150          | —                 | —              | —              | 0.012             | 0.006          | 2.115          |
| Arrangement       | —                 | —              | —              | —                 | —              | —              | 0.724               | 0.266          | 2.716          | —                 | —              | —              | —                 | —              | —              |

| Model quality                  | Memory   | Attention | Executive functions | Language | Difficulty |
|--------------------------------|----------|-----------|---------------------|----------|------------|
| Akaike Information Criterion   | 738.4285 | 773.6644  | 743.1042            | 691.5384 | 749.9689   |
| Bayesian Information Criterion | 758.0972 | 793.3330  | 772.5149            | 714.4852 | 776.1529   |
| Order                          | No       | No        | Yes                 | Yes      | Yes        |
| Autocorrelation                | No       | No        | Yes                 | Yes      | Yes        |
