# Supplementary material for: Capturing Expert Knowledge for the Personalization of Cognitive Rehabilitation: Study Combining Computational Modeling and a Participatory Design Strategy
Source: PubMed Central journal article supplement (PMC6318149; doi:10.2196/10714), 2018-12-06
Supplement: rehab_v5i2e10714_app7.pdf [file rehab_v5i2e10714_app7.pdf]

| Categorization    | Memory            |                |                | Attention         |                |                | Executive functions |                |                | Language          |                |                | Difficulty        |                |                |
|-------------------|-------------------|----------------|----------------|-------------------|----------------|----------------|---------------------|----------------|----------------|-------------------|----------------|----------------|-------------------|----------------|----------------|
| task              | Coefficient value | Standard error | <i>t</i> value | Coefficient value | Standard error | <i>t</i> value | Coefficient value   | Standard error | <i>t</i> value | Coefficient value | Standard error | <i>t</i> value | Coefficient value | Standard error | <i>t</i> value |
| Intercept         | 0.6               | 0.684          | 0.877          | -3.26             | 1.981          | -1.645         | 1.136               | 0.695          | 1.635          | 1.914             | 0.724          | 2.644          | 0.234             | 0.462          | 0.506          |
| Categories number | 0.9               | 0.156          | 5.754          | 3.75              | 1.262          | 2.971          | 0.989               | 0.148          | 6.702          | 0.586             | 0.151          | 3.871          | 1.165             | 0.145          | 8.048          |
| Items number      | —                 | —              | —              | -0.41             | 0.185          | -2.213         | —                   | —              | —              | —                 | —              | —              | —                 | —              | —              |

| Model quality                  | Memory   | Attention | Executive functions | Language | Difficulty |
|--------------------------------|----------|-----------|---------------------|----------|------------|
| Akaike Information Criterion   | 260.2888 | 233.4358  | 259.6256            | 263.7335 | 244.8731   |
| Bayesian Information Criterion | 268.5306 | 243.6511  | 267.8674            | 271.9753 | 257.2357   |
| Order                          | No       | No        | No                  | No       | Yes        |
| Autocorrelation                | No       | No        | No                  | No       | No         |
