# Supplementary material for: Capturing Expert Knowledge for the Personalization of Cognitive Rehabilitation: Study Combining Computational Modeling and a Participatory Design Strategy
Source: PubMed Central journal article supplement (PMC6318149; doi:10.2196/10714), 2018-12-06
Supplement: rehab_v5i2e10714_app8.pdf [file rehab_v5i2e10714_app8.pdf]

| Image Pairs task | Memory      |          |          | Attention   |          |          | Executive Functions |          |          | Language    |          |          | Difficulty  |          |          |
|------------------|-------------|----------|----------|-------------|----------|----------|---------------------|----------|----------|-------------|----------|----------|-------------|----------|----------|
|                  | Coefficient | Standard | <i>t</i> | Coefficient | Standard | <i>t</i> | Coefficient         | Standard | <i>t</i> | Coefficient | Standard | <i>t</i> | Coefficient | Standard | <i>t</i> |
|                  | value       | error    | value    | value       | error    | value    | value               | error    | value    | value       | error    | value    | Value       | error    | value    |
| Intercept        | 3.779       | 0.600    | 6.293    | 3.813       | 0.660    | 5.774    | 3.488               | 0.659    | 5.290    | 2.723       | 0.809    | 3.367    | 2.538       | 0.615    | 4.124    |
| Number of pairs  | 0.637       | 0.081    | 7.867    | 0.587       | 0.096    | 6.123    | 0.412               | 0.081    | 5.062    | 0.388       | 0.114    | 3.409    | 0.762       | 0.092    | 8.276    |

| Model quality                  | Memory   | Attention | Executive Functions | Language | Difficulty |
|--------------------------------|----------|-----------|---------------------|----------|------------|
| Akaike Information Criterion   | 230.5643 | 244.6216  | 236.9498            | 250.4309 | 237.4246   |
| Bayesian Information Criterion | 238.8061 | 252.8633  | 245.1916            | 260.7332 | 245.6663   |
| Order                          | No       | No        | No                  | Yes      | No         |
| Autocorrelation                | No       | No        | No                  | Yes      | No         |
