# Supplementary material for: Capturing Expert Knowledge for the Personalization of Cognitive Rehabilitation: Study Combining Computational Modeling and a Participatory Design Strategy
Source: PubMed Central journal article supplement (PMC6318149; doi:10.2196/10714), 2018-12-06
Supplement: rehab_v5i2e10714_app9.pdf [file rehab_v5i2e10714_app9.pdf]

| Mazes     | Memory      |          |          | Attention   |          |          | Executive functions |          |          | Language    |          |          | Difficulty  |          |          |
|-----------|-------------|----------|----------|-------------|----------|----------|---------------------|----------|----------|-------------|----------|----------|-------------|----------|----------|
| task      | Coefficient | Standard | <i>t</i> | Coefficient | Standard | <i>t</i> | Coefficient         | Standard | <i>t</i> | Coefficient | Standard | <i>t</i> | Coefficient | Standard | <i>t</i> |
|           | value       | error    | value    | value       | error    | value    | value               | error    | value    | value       | error    | value    | value       | error    | value    |
| Intercept | 1.867       | 0.475    | 3.932    | 2.876       | 0.612    | 4.701    | 2.390               | 0.678    | 3.527    | 2.233       | 0.416    | 5.364    | 1.733       | 0.628    | 2.759    |
| Size      | 1.000       | 0.221    | 4.532    | 1.200       | 0.186    | 6.460    | 1.375               | 0.217    | 6.328    | 0.525       | 0.198    | 2.655    | 1.450       | 0.188    | 7.706    |

| Model quality                  | Memory   | Attention | Executive functions | Language | Difficulty |
|--------------------------------|----------|-----------|---------------------|----------|------------|
| Akaike Information Criterion   | 245.2409 | 230.2526  | 249.9474            | 232.7764 | 245.6437   |
| Bayesian Information Criterion | 257.6036 | 238.4944  | 258.1892            | 245.1390 | 253.8855   |
| Order                          | Yes      | No        | No                  | Yes      | No         |
| Autocorrelation                | No       | No        | No                  | No       | No         |
