# Supplementary material for: Capturing Expert Knowledge for the Personalization of Cognitive Rehabilitation: Study Combining Computational Modeling and a Participatory Design Strategy
Source: PubMed Central journal article supplement (PMC6318149; doi:10.2196/10714), 2018-12-06
Supplement: rehab_v5i2e10714_app10.pdf [file rehab_v5i2e10714_app10.pdf]

| Memory of stories task | Memory            |                |                | Attention         |                |                | Executive functions |                |                | Language          |                |                | Difficulty        |                |                |
|------------------------|-------------------|----------------|----------------|-------------------|----------------|----------------|---------------------|----------------|----------------|-------------------|----------------|----------------|-------------------|----------------|----------------|
|                        | Coefficient value | Standard error | <i>t</i> value | Coefficient value | Standard error | <i>t</i> value | Coefficient value   | Standard error | <i>t</i> value | Coefficient value | Standard error | <i>t</i> value | Coefficient value | Standard error | <i>t</i> value |
| Intercept              | 3.60              | 0.561          | 6.413          | 4.2               | 0.644          | 6.517          | 1.90                | 0.705          | 2.693          | 3.083             | 0.726          | 4.248          | 2.800             | 0.529          | 5.295          |
| Size                   | 4.20              | 1.011          | 4.155          | 3.9               | 0.822          | 4.746          | 1.45                | 0.278          | 5.216          | 1.250             | 0.265          | 4.718          | 3.950             | 0.982          | 4.024          |
| Questions              | -0.85             | 0.331          | -2.569         | -0.8              | 0.263          | -3.039         | —                   | —              | —              | —                 | —              | —              | -0.725            | 0.321          | -2.257         |

| Model quality                  | Memory   | Attention | Executive functions | Language | Difficulty |
|--------------------------------|----------|-----------|---------------------|----------|------------|
| Akaike Information Criterion   | 234.0854 | 237.5185  | 270.4890            | 271.7985 | 227.5656   |
| Bayesian Information Criterion | 244.3007 | 249.7768  | 278.7308            | 280.0402 | 237.7809   |
| Order                          | No       | No        | No                  | No       | No         |
| Autocorrelation                | No       | No        | No                  | No       | No         |
